# Supplementary material for: A reversible Em-FRET rhodamine-based chemosensor for carboxylate anions using a ditopic receptor strategy
Source: Royal Society of Chemistry journal article supplement (doi:10.1039/b9nj00594c), 2010-01-01
Supplement: b9nj00594c.pdf [file b9nj00594c.pdf]

## Supporting Information

**Title:** A Reversible E<sub>m</sub>-FRET Rhodamine-Based Chemosensor for Carboxylate Anions Using a Ditopic Receptor Strategy  
**Authors:** Chatthai Kaewtong,<sup>\*a</sup> Jakkapong Noiseephum,<sup>a</sup> Yuwapon Uppa,<sup>b</sup> Nongnit Morakot,<sup>a</sup> Neramit Morakot,<sup>a</sup> Banchob Wannoo,<sup>a</sup> Thawatchai Tuntulani<sup>c</sup> and Buncha Pulpoka<sup>c</sup>

<sup>a</sup>*Supramolecular Chemistry Research Unit, Department of Chemistry and Center of Excellence for Innovation in Chemistry, Faculty of Science, Mahasarakham University, Mahasarakham, 44150, Thailand.*

<sup>b</sup>*Department of Chemistry, Faculty of Engineering, Rajamangala University of Technology Isan Khon Kaen Campus, Khonkaen 40000, Thailand.*

<sup>c</sup>*Supramolecular Chemistry Research Unit, Department of Chemistry, Faculty of Science, Chulalongkorn University, Bangkok 10330, Thailand.*

[kchatthai@gmail.com](mailto:kchatthai@gmail.com)

## Contents

|                                                                                                                                                                                                                                                                                                                                                                                                   |     |
|---------------------------------------------------------------------------------------------------------------------------------------------------------------------------------------------------------------------------------------------------------------------------------------------------------------------------------------------------------------------------------------------------|-----|
| <b>Scheme S1.</b> Synthetic pathways of <b>L1</b> and <b>2</b> .                                                                                                                                                                                                                                                                                                                                  | S3  |
| <b>Fig. S1</b> UV-vis spectra of <b>L1</b> upon addition of various anions. Conditions: <b>L1</b> (10 $\mu\text{M}$ ) in MeCN, TBAX (30 equiv) in MeCN.                                                                                                                                                                                                                                           | S3  |
| <b>Fig. S2</b> Fluorescence emission spectra of <b>L1</b> upon addition of various anions. Conditions: <b>L1</b> (10 $\mu\text{M}$ ) in MeCN, excitation at 300 nm, TBAX (30 equiv) in MeCN.                                                                                                                                                                                                      | S4  |
| <b>Fig. S3</b> Proposed binding modes of (a) <b>L1</b> , (b) <b>L1</b> +PhCOO <sup>-</sup> (1:1), (c) <b>L1</b> +PhCOO <sup>-</sup> (2:2), (c) <b>L1</b> +Cu <sup>2+</sup> , (d) <b>L1</b> •Cu <sup>2+</sup> +CH <sub>3</sub> COO <sup>-</sup> (1:1), (f) <b>L1</b> •Cu <sup>2+</sup> +CH <sub>3</sub> COO <sup>-</sup> (2:2).                                                                    | S5  |
| <b>Fig. S4</b> Job plot between receptor <b>L1</b> and various Cu <sup>2+</sup> concentration. The total concentration of <b>L1</b> + Cu <sup>2+</sup> was kept constant at 10 $\mu\text{M}$ . The complex concentration, [HG] was calculated by the equation; [HG] = $\Delta A/A_0 \cdot [H]$ . (a) UV-vis spectra at 275 nm, (b) fluorescent spectra at 558 nm ( $\lambda_{\text{ex}}$ 300 nm). | S7  |
| <b>Fig. S5</b> Mole ratio plot between receptor <b>L1</b> and various Cu <sup>2+</sup> concentration (equiv). (a) UV-vis spectra at 558 nm, (b) fluorescent spectra at 584 nm ( $\lambda_{\text{ex}}$ 300 nm).                                                                                                                                                                                    | S8  |
| <b>Fig. S6</b> Time evolution of sensor <b>L1</b> (10 $\mu\text{M}$ ) in MeCN in the presence of 5.0 equiv. of Cu <sup>2+</sup> ion. Spectra changes of UV-vis intensity at 275, 560 nm (a) and fluorescence intensity at 490 and 584 nm, $\lambda_{\text{ex}}$ = 300 nm (b) as a function of time (0.0 to 3.0 h).                                                                                | S9  |
| <b>Fig. S7</b> UV-vis spectra excess of <b>L1</b> •Cu <sup>2+</sup> upon addition of various anions. Conditions: <b>L1</b> •Cu <sup>2+</sup> (10 $\mu\text{M}$ ) in MeCN, TBAX (30 equiv.) in MeCN.                                                                                                                                                                                               | S10 |
| <b>Fig. S8</b> <sup>1</sup> H NMR spectrum of <i>N</i> -(rhodamine B)lactam-ethylenediamine ( <b>1</b> ).                                                                                                                                                                                                                                                                                         | S10 |
| <b>Fig. S9</b> <sup>1</sup> H NMR spectrum of 1-butyl-3-(naphthalen-1-yl)thiourea ( <b>2</b> ).                                                                                                                                                                                                                                                                                                   | S11 |
| <b>Fig. S10</b> <sup>1</sup> H NMR spectrum of <i>N</i> -(Rhodamine-B)lactam- <i>N'</i> -naphthylthiourea-ethylenediamine ( <b>L1</b> ).                                                                                                                                                                                                                                                          | S11 |
| <b>Fig. S11</b> <sup>13</sup> C NMR spectrum of <i>N</i> -(Rhodamine-B)lactam- <i>N'</i> -naphthylthiourea-ethylenediamine ( <b>L1</b> ).                                                                                                                                                                                                                                                         | S12 |
| <b>Fig. S12</b> ESI-Mass spectrum of <i>N</i> -(Rhodamine-B)lactam- <i>N'</i> -naphthylthiourea-ethylenediamine ( <b>L1</b> ).                                                                                                                                                                                                                                                                    | S13 |

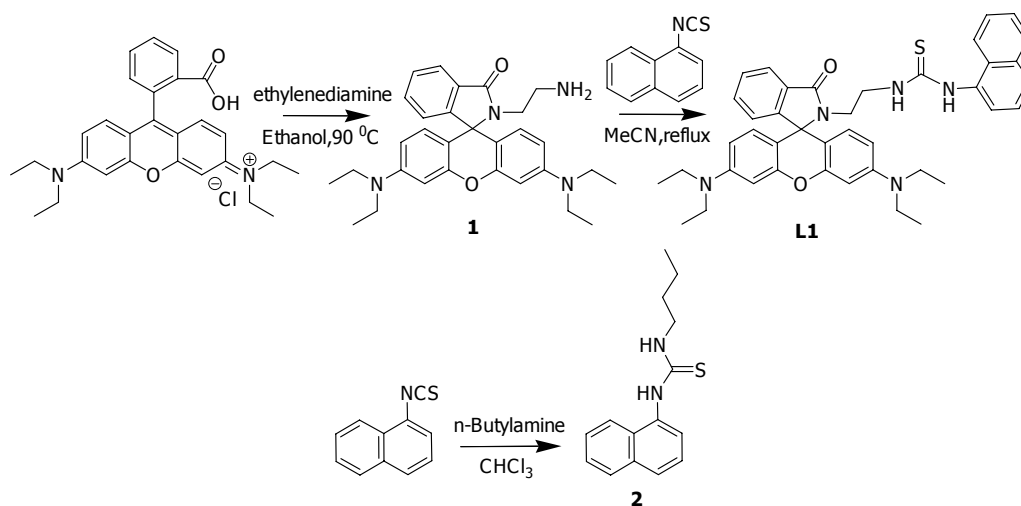

**Scheme S1.** Synthetic pathways of **L1** and **2**

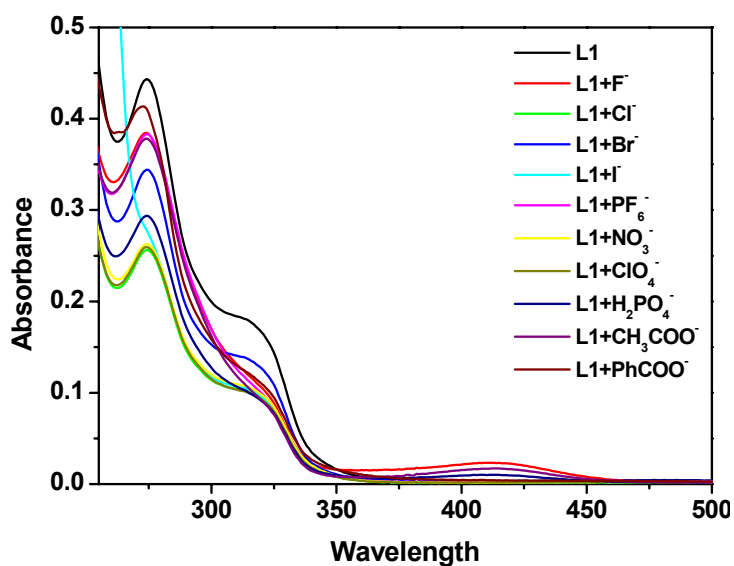

**Fig. S1** UV-vis spectra of **L1** upon addition of various anions. Conditions: **L1** (10  $\mu$ M) in MeCN, TBAX (30 equiv) in MeCN.

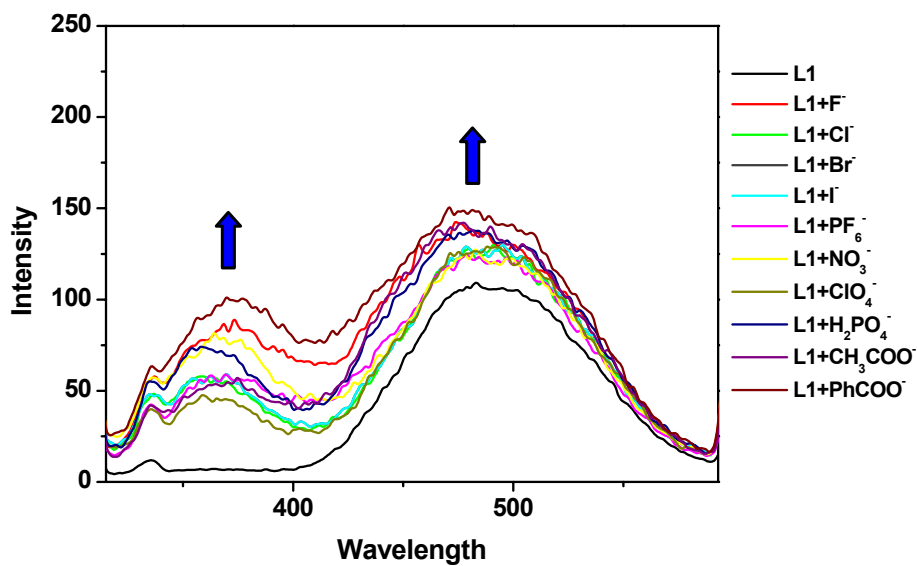

**Fig. S2** Fluorescence emission spectra of **L1** upon addition of various anions. Conditions: **L1** (10  $\mu$ M) in MeCN, excitation at 300 nm, TBAX (30 equiv) in MeCN.

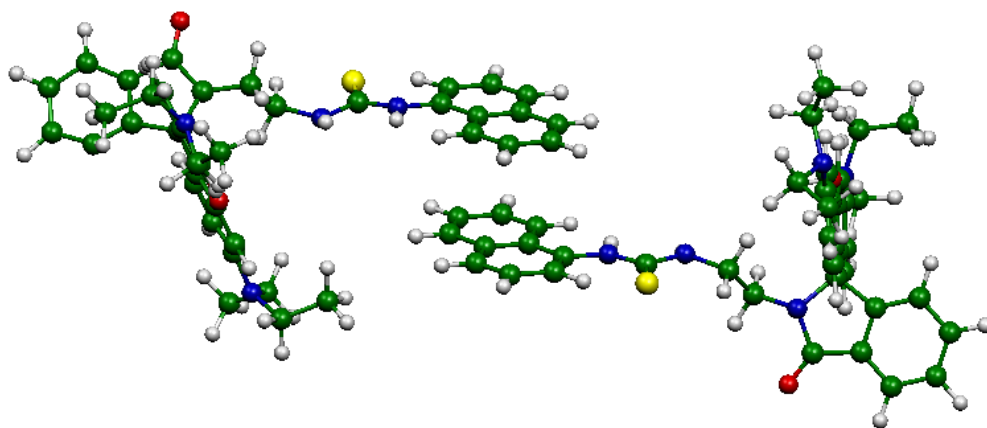

a)

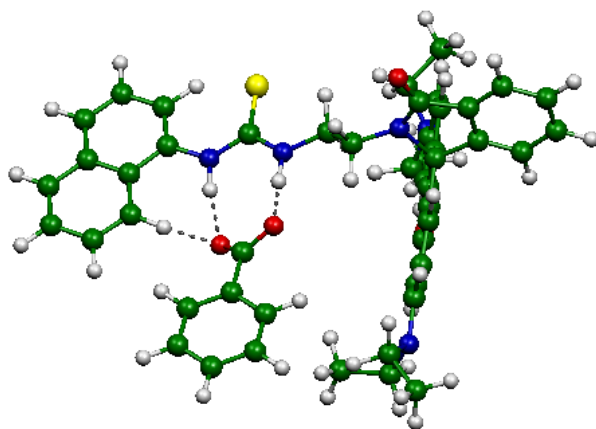

b)

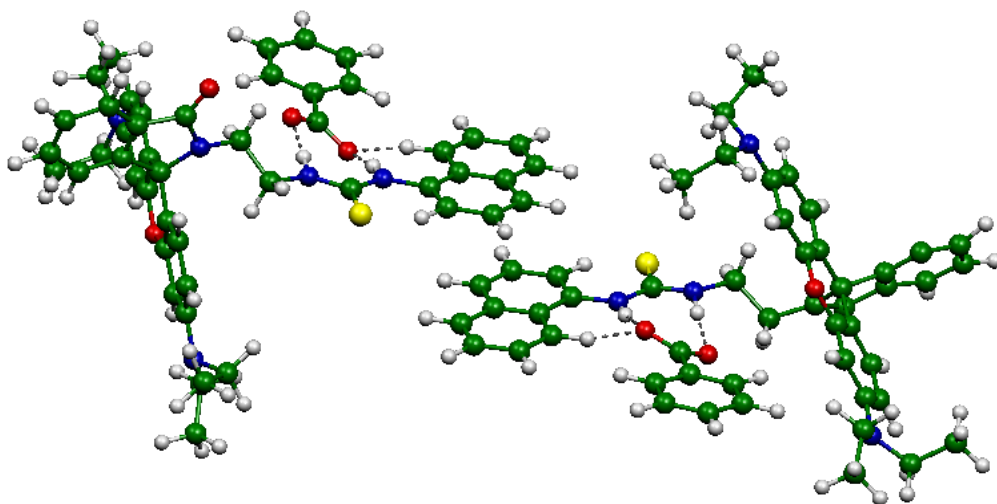

c)

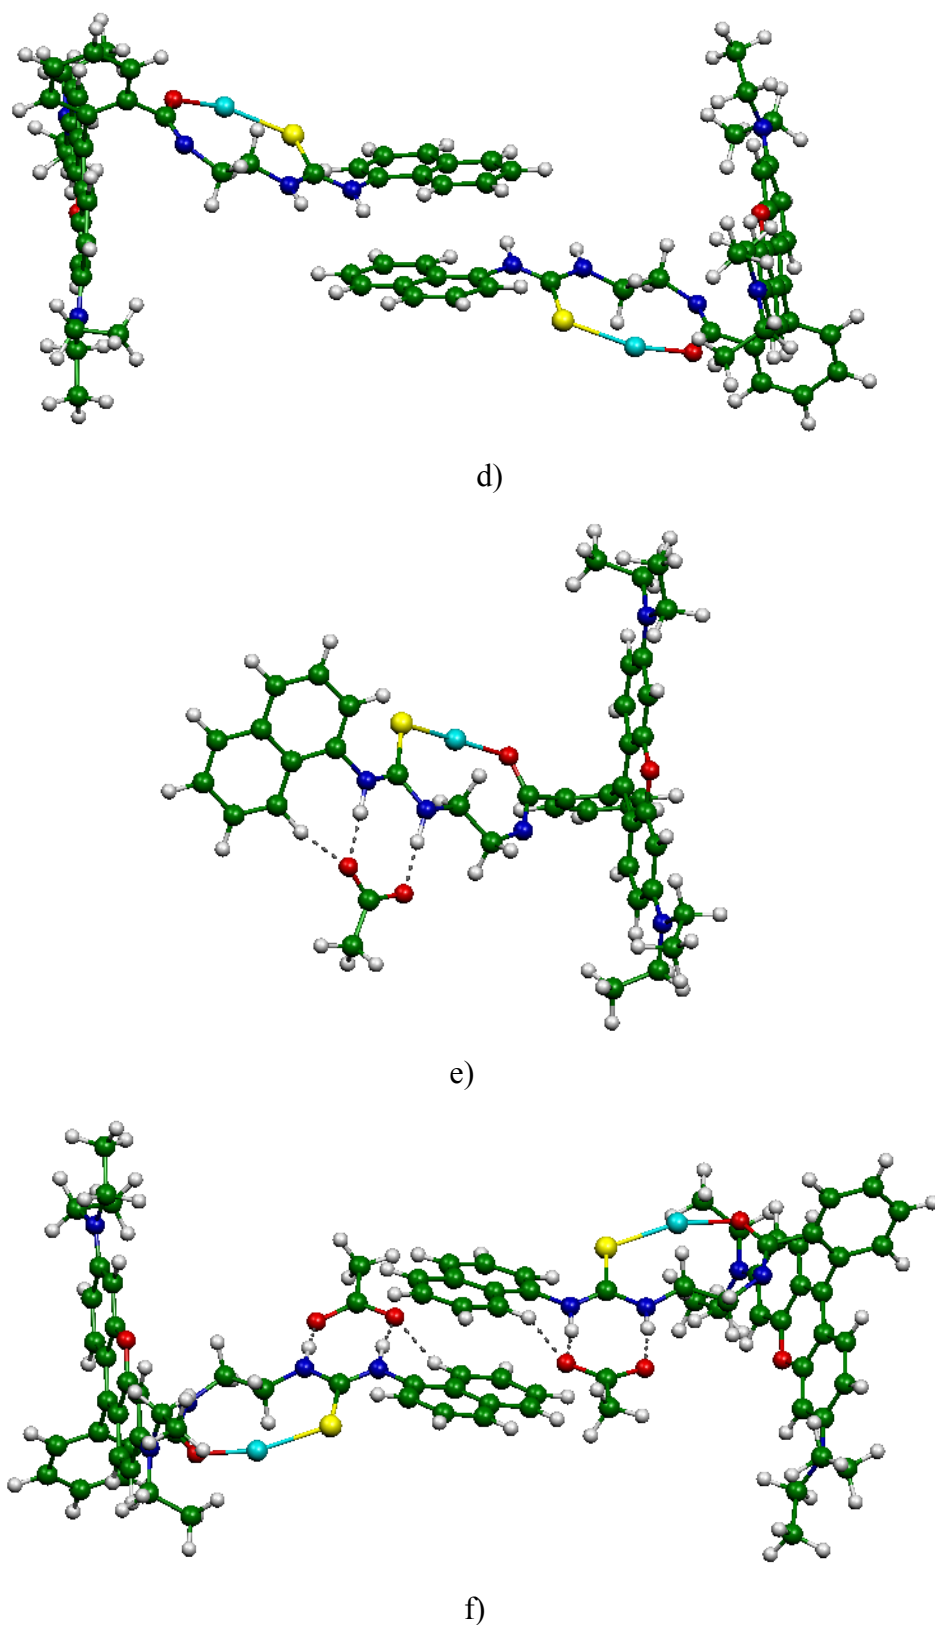

**Fig. S3** Proposed binding modes of (a) **L1**, (b) **L1+PhCOO<sup>-</sup>** (1:1), (c) **L1+PhCOO<sup>-</sup>** (2:2), (d) **L1+Cu<sup>2+</sup>**, (e) **L1·Cu<sup>2+</sup>+CH<sub>3</sub>COO<sup>-</sup>** (1:1), (f) **L1·Cu<sup>2+</sup>+CH<sub>3</sub>COO<sup>-</sup>** (2:2) were generated with the MOLEKEL 4.3 program.<sup>S1</sup>

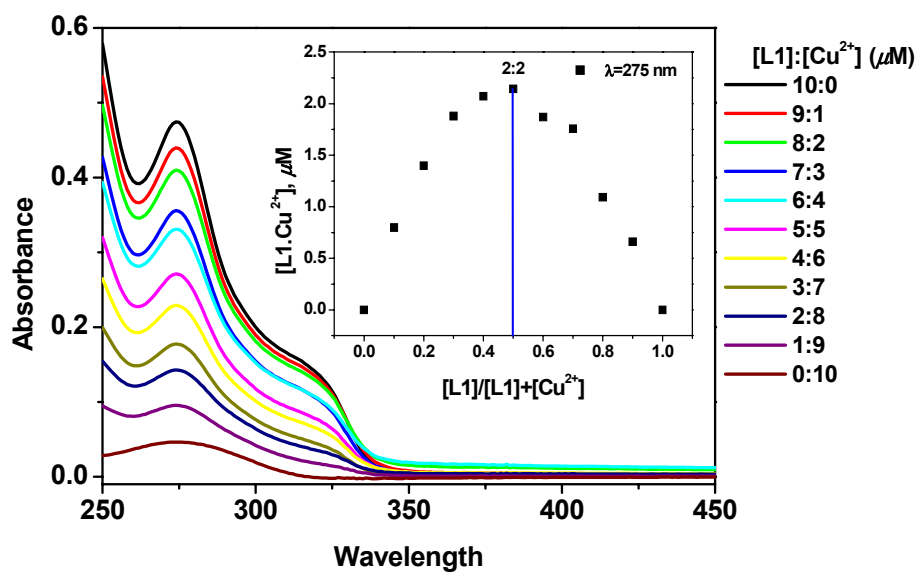

a)

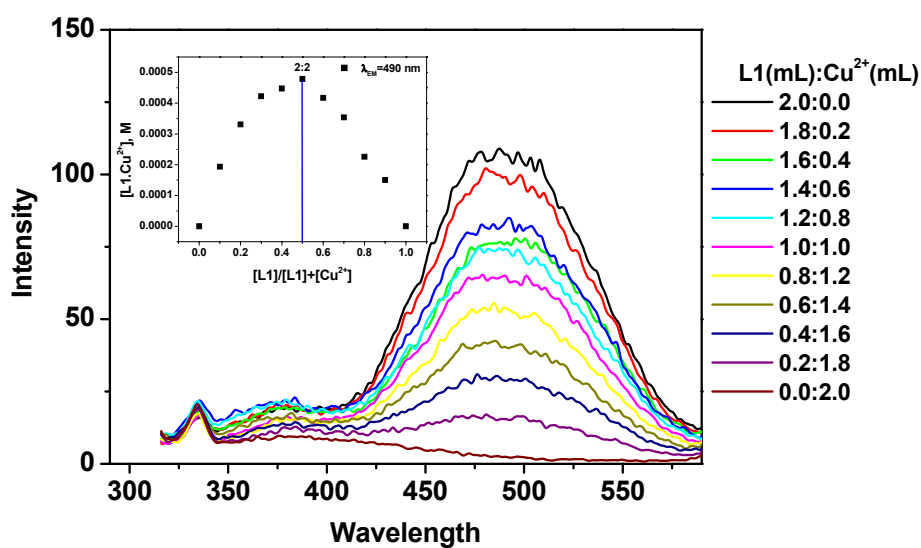

b)

**Fig. S4** Job plot<sup>S2</sup> between receptor **L1** and various Cu<sup>2+</sup> concentrations. The total concentration of **L1** + Cu<sup>2+</sup> was kept constant at 10 μM. The complex concentration, [HG] was calculated by the equation; [HG] = ΔA/A<sub>0</sub>\*[H]. (a) UV-vis spectra at 275 nm, (b) fluorescent spectra at 490 nm (λ<sub>ex</sub> 300 nm).

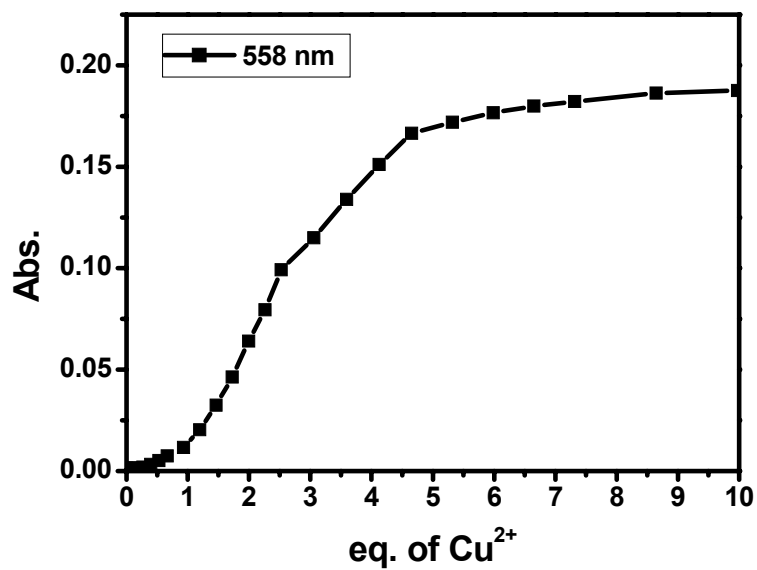

a)

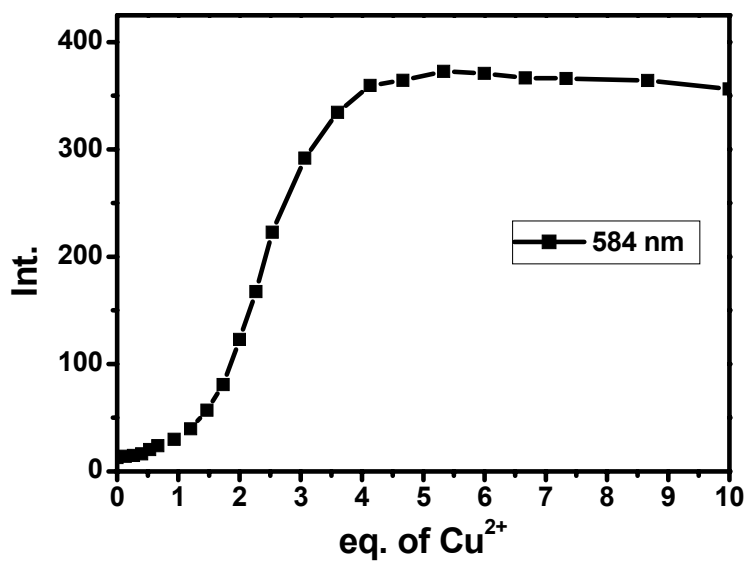

b)

**Fig. S5** Mole ratio plots<sup>S3</sup> between receptor L1 and various  $\text{Cu}^{2+}$  concentrations (equiv). (a) UV-vis spectra at 558 nm, (b) fluorescent spectra at 584 nm ( $\lambda_{\text{ex}}$  300 nm).



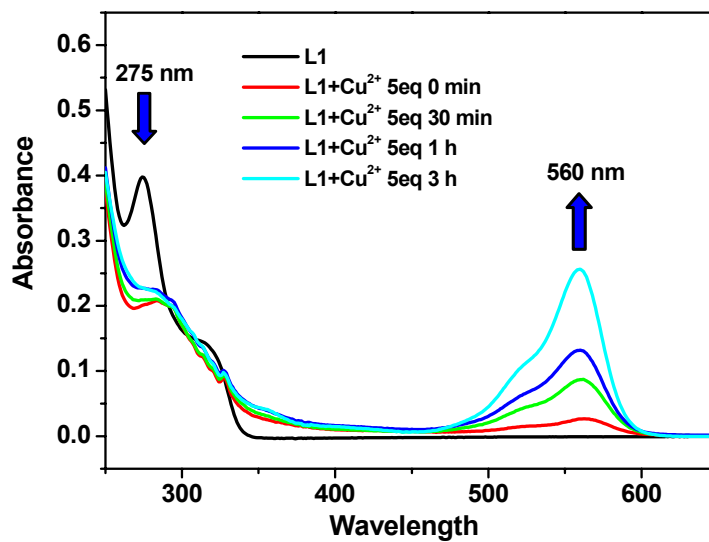

a)

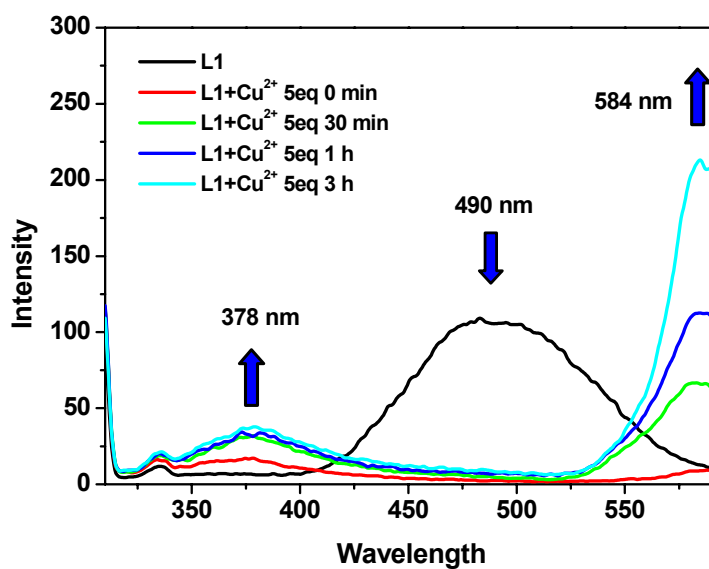

b)

**Fig. S6** Time evolution of sensor L1 (10  $\mu\text{M}$ ) in MeCN in the presence of 5.0 equiv. of Cu<sup>2+</sup> ion. Spectra changes of UV-vis intensity at 275, 560 nm (a) and fluorescence intensity at 490 and 584 nm,  $\lambda_{\text{ex}} = 300$  nm (b) as a function of time (0.0 to 3.0 h).

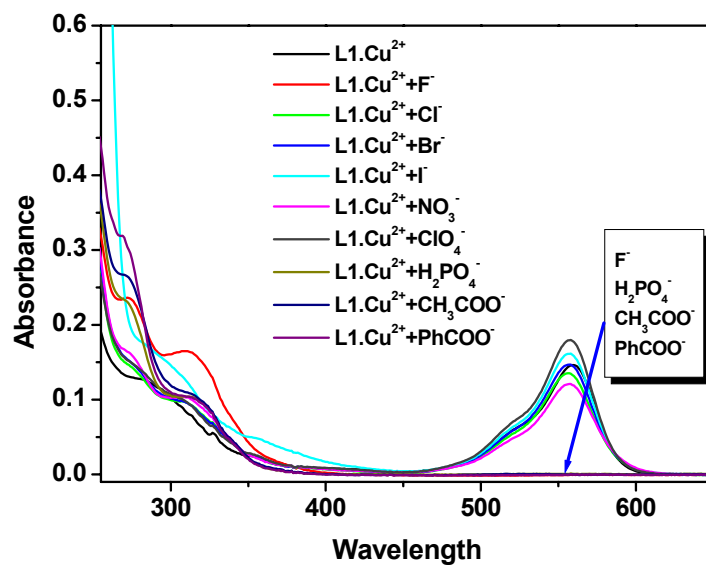

**Fig. S7** UV-vis spectra excess of L1•Cu<sup>2+</sup> upon addition of various anions. Conditions: L1•Cu<sup>2+</sup> (10 μM) in MeCN, TBAX (30 equiv.) in MeCN.

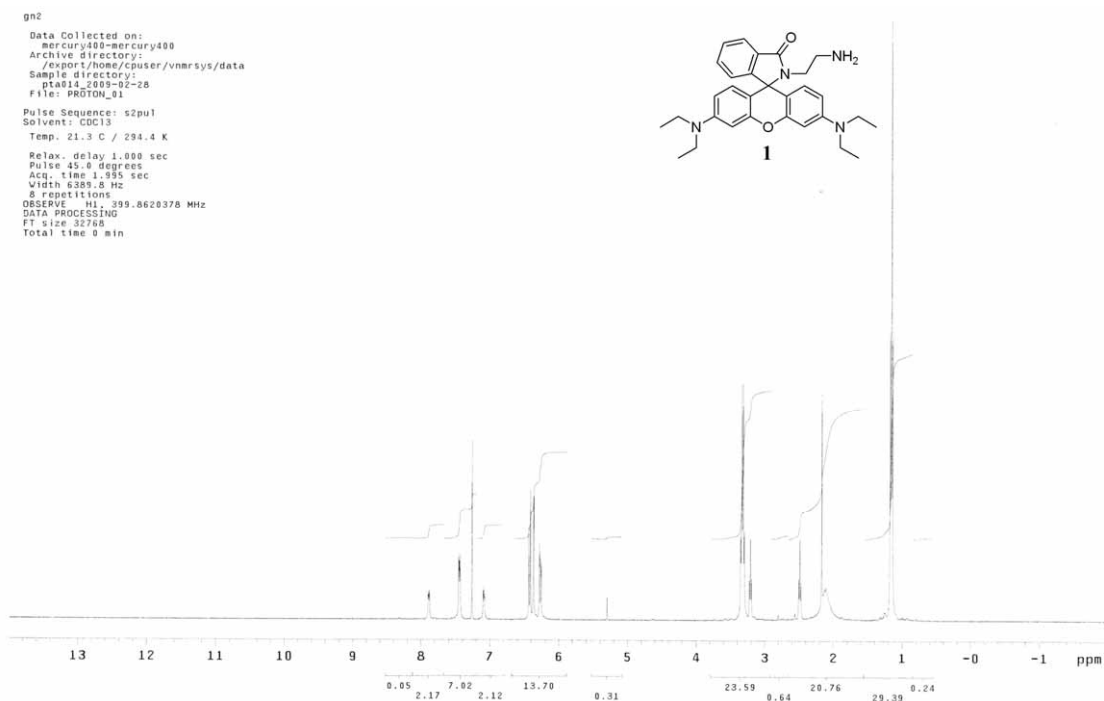

**Fig. S8** <sup>1</sup>H NMR spectrum of N-(rhodamine B)lactam-ethylenediamine (**1**).

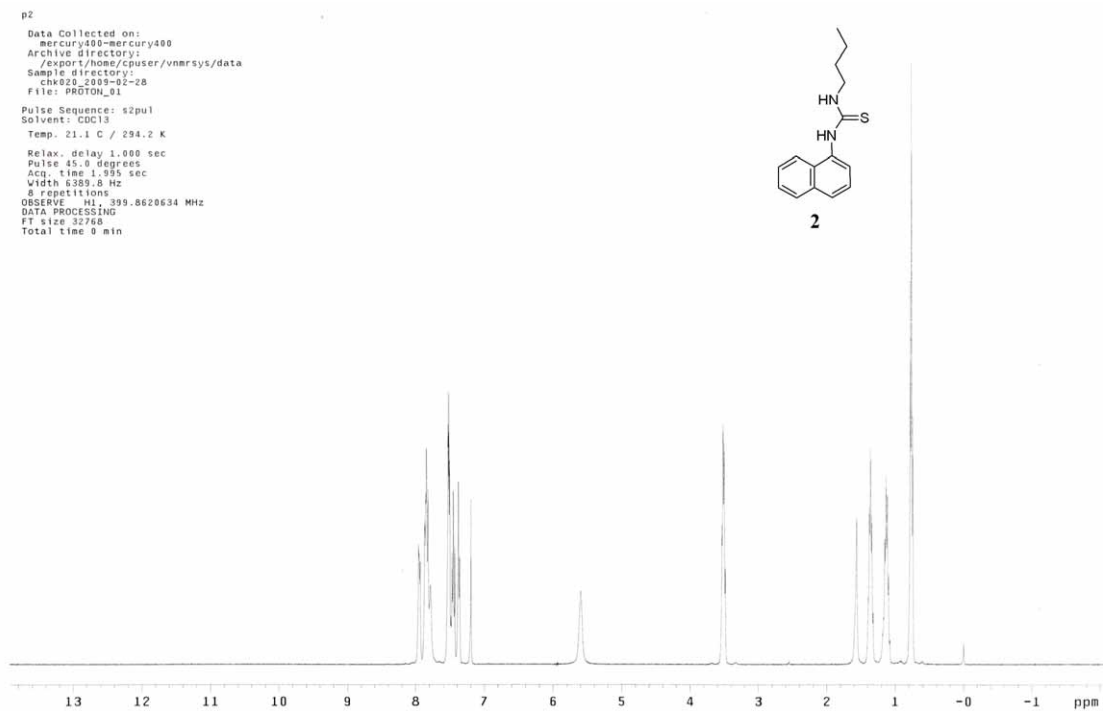

**Fig. S9**  $^1\text{H}$  NMR spectrum of 1-butyl-3-(naphthalen-1-yl)thiourea (**2**).

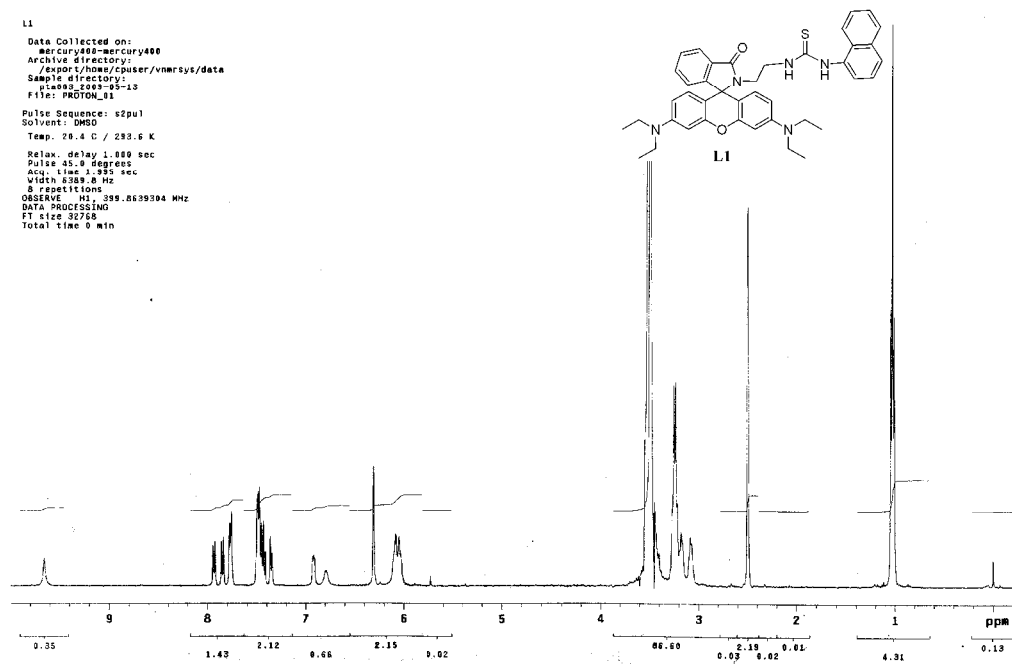

**Fig. S10**  $^1\text{H}$  NMR spectrum of *N*-(Rhodamine B)lactam-*N'*-naphthylthiourea-ethylenediamine (**L1**).

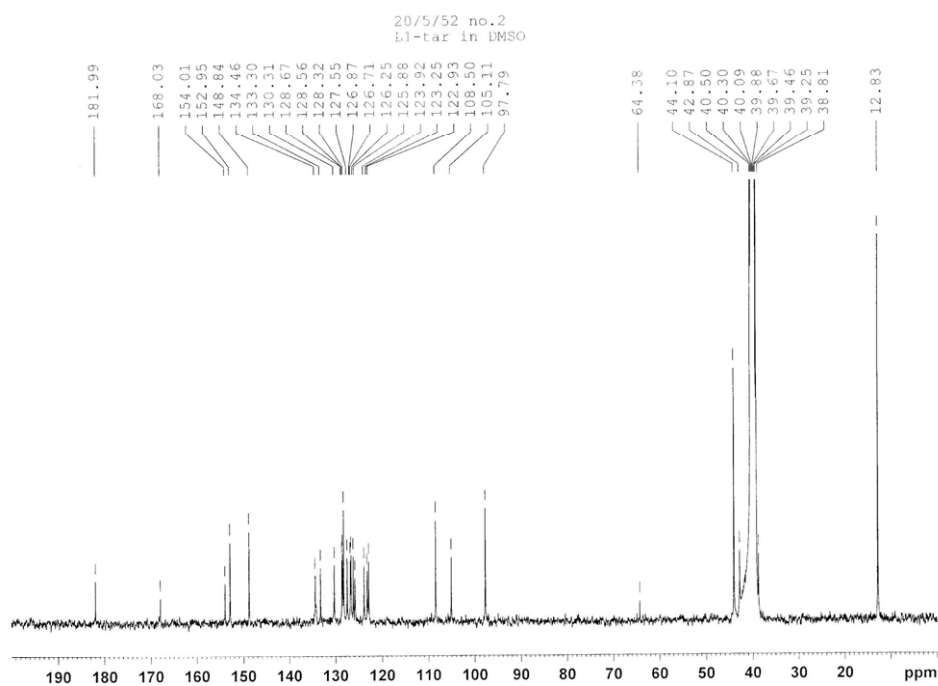

**Fig. S11**  $^{13}\text{C}$  NMR spectrum of *N*-(Rhodamine B)lactam-*N'*-naphthylthiourea-ethylenediamine (**L1**).

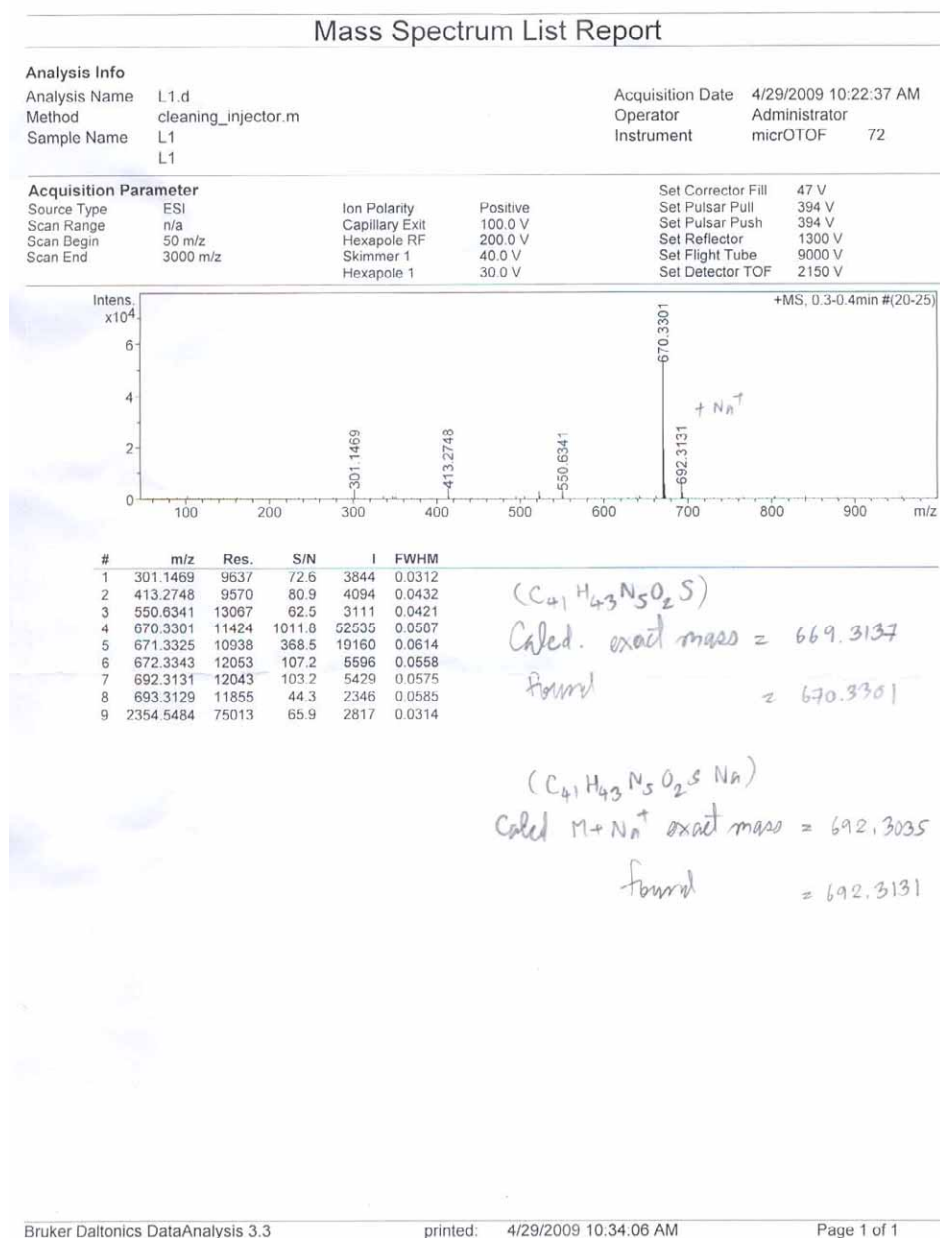

**Fig. S12** ESI-Mass spectrum of *N*-(Rhodamine B)lactam-*N'*-naphthylthiourea-ethylenediamine (**L1**).

S1 P. P. Flükiger, H.P. Lüthi, S. Portmann, J. Weber, Swiss Center for Scientific Computing, Manno (Switzerland), 2000–2002, MOLEKEL 4.3

S2 P. Job, Ann. Chim., 1928, 9, 113.

S3 J. H. Yoe and A. E. Harvey, J. Am. Chem. Soc., 1948, 70, 648.
